# Supplementary material for: Comparison of the predictive accuracy of multiple definitions of cognitive impairment for incident dementia: a 20-year follow-up of the Whitehall II cohort study
Source: PubMed Central journal article supplement (PMC8245324; doi:10.1016/s2666-7568(21)00117-3), 2021-07
Supplement: mmc1.pdf [file mmc1.pdf]

# THE LANCET

## Healthy Longevity

### Supplementary appendix

This appendix formed part of the original submission and has been peer reviewed. We post it as supplied by the authors.

Supplement to: Machado-Fragua MD, Aline DugravotA, Dumurgier J, et al. Comparison of the predictive accuracy of multiple definitions of cognitive impairment for incident dementia: a 20-year follow-up of the Whitehall II cohort study. *Lancet Healthy Longev* 2021; published online xxx. [https://doi.org/10.1016/S2666-7568\(21\)00117-3](https://doi.org/10.1016/S2666-7568(21)00117-3).

# Comparison of the predictive accuracy of multiple definitions of cognitive impairment for incident dementia: A 20-year follow-up of the Whitehall II cohort study

Marcos D. Machado-Fragua, Aline Dugravot, Julien Dumurgier, Mika Kivimaki, Andrew Sommerlad, Benjamin Landré, Aurore Fayosse, Séverine Sabia, Archana Singh-Manoux

|                                                                                                                                                                                   |    |
|-----------------------------------------------------------------------------------------------------------------------------------------------------------------------------------|----|
| Stata syntax for the definition of poor cognitive performance (example: age and sex-specific threshold) .....                                                                     | 2  |
| eTable 1. Kappa coefficients for agreement between seven cognitive impairment definitions .....                                                                                   | 3  |
| eTable 2. Assessment of the role of cognitive decline in classification of cognitive impairment: association with risk of dementia.....                                           | 4  |
| eTable 3. Predictive performance of seven cognitive impairment definitions for dementia using inverse probability weighting to account for missing data .....                     | 5  |
| eTable 4. Predictive performance of seven cognitive impairment definitions for dementia using 1 SD threshold to define poor cognitive performance .....                           | 6  |
| eTable 5. Predictive performance of seven cognitive impairment definitions for dementia using 1.96 SD threshold to define poor cognitive performance SD .....                     | 7  |
| eTable 6. Predictive performance of seven cognitive impairment definitions for dementia in participants 65 years and older at assessment of CI .....                              | 8  |
| eTable 7. Role of participants who revert their cognitive status to normal between 1997-2009 in classification of cognitive impairment: association with risk of dementia .....   | 9  |
| eTable 8. Predictive performance of different predictive models including cognitive impairment definitions and demographic variables (age, sex, and education) for dementia ..... | 10 |

## SUPPLEMENTAL METHODS

### Stata syntax for the definition of poor cognitive performance (example: age and sex-specific threshold)

All thresholds were defined on distributions within the Whitehall II study population.

```
/* I: Poor cognitive performance- Low Z-score          */
/*****/
/* LOW Z-SCORE : CONSTRUCTION */
```

```
/* ph: specific prefix of each data collection wave
```

```
Domain : standardized score of each cognitive domain
```

```
Phase: name of each data collection wave */
```

```
program zscore
args ph domain phase
regress `ph`domain' `ph'age_si sex
predict `ph`domain'_r, r
gen `ph`domain'_rmse=e(rmse)
gen `ph`domain'_z=`ph`domain'_r/`ph`domain'_rmse
gen `ph`domain'_zlow=0
replace `ph`domain'_zlow=1 if `ph`domain'_z<=-1.5
replace `ph`domain'_zlow=. if `ph`domain'_z==.
label var `ph`domain'_zlow "low score for `domain' domain (`phase)'"
end
```

```
zscore j memory s9
zscore j language s9
zscore j executive s9
zscore j ScCog s9
```

**eTable 1. Kappa coefficients for agreement between seven cognitive impairment definitions**

| <b>Cognitive Impairment<sup>a</sup></b> | Definition 1 | Definition 2 | Definition 3 | Definition 4 | Definition 5 | Definition 6 | Definition 7 |
|-----------------------------------------|--------------|--------------|--------------|--------------|--------------|--------------|--------------|
| Definition 1                            | -            | 0.13         | 0.54         | 0.79         | 0.46         | 0.69         | 0.41         |
| Definition 2                            | -            | -            | 0.30         | 0.14         | 0.31         | 0.15         | 0.32         |
| Definition 3                            | -            | -            | -            | 0.46         | 0.86         | 0.42         | 0.78         |
| Definition 4                            | -            | -            | -            | -            | 0.55         | 0.72         | 0.44         |
| Definition 5                            | -            | -            | -            | -            | -            | 0.45         | 0.83         |
| Definition 6                            | -            | -            | -            | -            | -            | -            | 0.56         |
| Definition 7                            | -            | -            | -            | -            | -            | -            | -            |

<sup>a</sup> Cognitive Impairment defined as follows:

1. Age and sex threshold for poor cognitive performance.
2. Cognitive decline.
3. Age, sex threshold for poor cognitive performance AND cognitive decline.
4. Age, sex, education threshold for poor cognitive performance.
5. Age, sex, education threshold for poor cognitive performance AND cognitive decline.
6. Age, sex, occupation threshold for poor cognitive performance.
7. Age, sex, occupation threshold for poor cognitive performance AND cognitive decline.

**eTable 2. Assessment of the role of cognitive decline in classification of cognitive impairment: association with risk of dementia**

| <b>Cognitive Impairment (CI)<sup>a</sup></b>                             | <b>N cases/total</b> | <b>Rate of dementia per 1000 person years</b> | <b>Follow-up years M(SD)</b> | <b>HR (95% Confidence Interval)</b> | <b><i>p</i>-value<sup>b</sup></b> |
|--------------------------------------------------------------------------|----------------------|-----------------------------------------------|------------------------------|-------------------------------------|-----------------------------------|
| <b>Age and sex threshold for poor cognitive performance</b>              |                      |                                               |                              |                                     |                                   |
| Non-CI                                                                   | 179/4866             | 3.7                                           | 10.1 (1.7)                   | 1 (Ref.)                            |                                   |
| Poor cognitive performance only                                          | 31/483               | 6.5                                           | 9.9 (2.0)                    | 1.79 (1.22, 2.61)                   |                                   |
| Poor cognitive performance & cognitive decline                           | 60/338               | 19.8                                          | 9.0 (2.9)                    | 5.67 (4.23, 7.60)                   | <.0001                            |
| <b>Age, sex, and education threshold for poor cognitive performance</b>  |                      |                                               |                              |                                     |                                   |
| Non-CI                                                                   | 175/4850             | 3.6                                           | 10.1 (1.7)                   | 1 (Ref.)                            |                                   |
| Poor cognitive performance only                                          | 32/490               | 6.6                                           | 9.9 (2.0)                    | 1.85 (1.27, 2.70)                   |                                   |
| Poor cognitive performance & cognitive decline                           | 63/347               | 20.2                                          | 9.0 (2.9)                    | 5.90 (4.42, 7.87)                   | <.0001                            |
| <b>Age, sex, and occupation threshold for poor cognitive performance</b> |                      |                                               |                              |                                     |                                   |
| Non-CI                                                                   | 178/4861             | 3.6                                           | 10.1 (1.8)                   | 1 (Ref.)                            |                                   |
| Poor cognitive performance only                                          | 31/472               | 6.6                                           | 10.0 (1.9)                   | 1.81 (1.24, 2.65)                   |                                   |
| Poor cognitive performance & cognitive decline                           | 61/354               | 19.0                                          | 9.0 (2.9)                    | 5.44 (4.07, 7.28)                   | <.0001                            |

HR: Hazard Ratio, M(SD)=Mean (Standard Deviation).

<sup>a</sup> Cognitive impairment categories are mutually exclusive.

<sup>b</sup> *p*-value for the difference between poor cognitive performance only and poor cognitive performance & definite cognitive decline.

**eTable 3. Predictive performance of seven cognitive impairment definitions for dementia using inverse probability weighting to account for missing data**

| <b>Cognitive Impairment (CI) definitions</b>                                                  | <b>N cases /total</b> | <b>Rate of dementia/ 1000 person-years</b> | <b>Follow-up years M(SD)</b> | <b>HR (95% Confidence Interval)</b> | <b>R<sup>2</sup> (95% Confidence Interval)</b> | <b>AIC</b> | <b>Δ AIC</b> | <b>Sensitivity %</b> | <b>Specificity %</b> | <b>C-Statistic (95% Confidence Interval)</b> | <b>p-value<sup>a</sup></b> |
|-----------------------------------------------------------------------------------------------|-----------------------|--------------------------------------------|------------------------------|-------------------------------------|------------------------------------------------|------------|--------------|----------------------|----------------------|----------------------------------------------|----------------------------|
| <b>1. Age and sex threshold for poor cognitive performance</b>                                |                       |                                            |                              |                                     |                                                |            |              |                      |                      |                                              |                            |
| Non-CI                                                                                        | 179/4866              | 4.6                                        | 10.1 (1.7)                   | 1 (Ref.)                            | 0.219                                          | 5959.5     | Ref.         | 32.9                 | 86.6                 | 0.621                                        | Ref.                       |
| CI                                                                                            | 91/821                | 14.6                                       | 9.5 (2.4)                    | 3.23 (2.47, 4.23)                   | (0.119, 0.338)                                 |            |              |                      |                      | (0.588, 0.653)                               |                            |
| <b>2. Cognitive decline</b>                                                                   |                       |                                            |                              |                                     |                                                |            |              |                      |                      |                                              |                            |
| Non-CI                                                                                        | 136/4202              | 4.4                                        | 10.1 (1.7)                   | 1 (Ref.)                            | 0.180                                          | 5978.6     | 19.1         | 48.4                 | 75.1                 | 0.618                                        | .88                        |
| CI                                                                                            | 134/1485              | 11.7                                       | 9.6 (2.3)                    | 2.70 (2.09, 3.48)                   | (0.099, 0.280)                                 |            |              |                      |                      | (0.586, 0.650)                               |                            |
| <b>3. Age, sex threshold for poor cognitive performance AND cognitive decline</b>             |                       |                                            |                              |                                     |                                                |            |              |                      |                      |                                              |                            |
| Non-CI                                                                                        | 210/5349              | 5.1                                        | 10.1 (1.8)                   | 1 (Ref.)                            | 0.258                                          | 5939.5     | - 20.0       | 21.8                 | 94.9                 | 0.597                                        | .07                        |
| CI                                                                                            | 60/338                | 23.9                                       | 9.0 (2.9)                    | 4.94 (3.64, 6.70)                   | (0.140, 0.379)                                 |            |              |                      |                      | (0.569, 0.626)                               |                            |
| <b>4. Age, sex, education threshold for poor cognitive performance</b>                        |                       |                                            |                              |                                     |                                                |            |              |                      |                      |                                              |                            |
| Non-CI                                                                                        | 175/4850              | 4.5                                        | 10.1 (1.7)                   | 1 (Ref.)                            | 0.243                                          | 5947.3     | - 12.2       | 34.3                 | 86.4                 | 0.625                                        | .63                        |
| CI                                                                                            | 95/837                | 15.1                                       | 9.5 (2.5)                    | 3.43 (2.63, 4.47)                   | (0.143, 0.364)                                 |            |              |                      |                      | (0.593, 0.657)                               |                            |
| <b>5. Age, sex, education threshold for poor cognitive performance AND cognitive decline</b>  |                       |                                            |                              |                                     |                                                |            |              |                      |                      |                                              |                            |
| Non-CI                                                                                        | 207/5340              | 5.1                                        | 10.1 (1.8)                   | 1 (Ref.)                            | 0.264                                          | 5936.5     | - 23.0       | 22.4                 | 94.8                 | 0.598                                        | .10                        |
| CI                                                                                            | 63/347                | 24.1                                       | 9.0 (2.9)                    | 4.99 (3.69, 6.74)                   | (0.150, 0.390)                                 |            |              |                      |                      | (0.569, 0.626)                               |                            |
| <b>6. Age, sex, occupation threshold for poor cognitive performance</b>                       |                       |                                            |                              |                                     |                                                |            |              |                      |                      |                                              |                            |
| Non-CI                                                                                        | 178/4861              | 4.8                                        | 10.1 (1.8)                   | 1 (Ref.)                            | 0.206                                          | 5965.6     | 6.1          | 32.5                 | 86.5                 | 0.613                                        | .52                        |
| CI                                                                                            | 92/826                | 14.9                                       | 9.6 (2.4)                    | 3.20 (2.45, 4.19)                   | (0.110, 0.315)                                 |            |              |                      |                      | (0.582, 0.645)                               |                            |
| <b>7. Age, sex, occupation threshold for poor cognitive performance AND cognitive decline</b> |                       |                                            |                              |                                     |                                                |            |              |                      |                      |                                              |                            |
| Non-CI                                                                                        | 209/5333              | 5.2                                        | 10.1 (1.8)                   | 1 (Ref.)                            | 0.246                                          | 5945.7     | - 13.8       | 21.6                 | 94.6                 | 0.592                                        | .06                        |
| CI                                                                                            | 61/354                | 23.8                                       | 9.0 (2.9)                    | 4.83 (3.56, 6.55)                   | (0.135, 0.373)                                 |            |              |                      |                      | (0.564, 0.620)                               |                            |

HR: Hazard Ratio, CI: Cognitive impairment, R<sup>2</sup>=Royston's R<sup>2</sup>, AIC: Akaike information criterion, C-Statistic=Harrell's C-index, M(SD)=Mean (Standard Deviation).

<sup>a</sup>p values for difference in C-statistic.

**eTable 4. Predictive performance of seven cognitive impairment definitions for dementia using 1 SD threshold to define poor cognitive performance**

| <b>Cognitive Impairment (CI) definitions</b>                                                  | <b>N cases /total</b> | <b>Rate of dementia/ 1000 person-years</b> | <b>Follow-up years M(SD)</b> | <b>HR (95% Confidence Interval)</b> | <b>R<sup>2</sup> (95% Confidence Interval)</b> | <b>AIC</b> | <b>Δ AIC</b> | <b>Sensitivity %</b> | <b>Specificity %</b> | <b>C-Statistic (95% Confidence Interval)</b> | <b>p-value<sup>a</sup></b> |
|-----------------------------------------------------------------------------------------------|-----------------------|--------------------------------------------|------------------------------|-------------------------------------|------------------------------------------------|------------|--------------|----------------------|----------------------|----------------------------------------------|----------------------------|
| <b>1. Age and sex threshold for poor cognitive performance</b>                                |                       |                                            |                              |                                     |                                                |            |              |                      |                      |                                              |                            |
| Non-CI                                                                                        | 126/3954              | 3.2                                        | 10.1 (1.7)                   | 1 (Ref.)                            | 0.146                                          | 4532.1     | Ref.         | 53.0                 | 70.8                 | 0.624                                        | Ref.                       |
| CI                                                                                            | 144/1733              | 8.5                                        | 9.7 (2.2)                    | 2.74 (2.16, 3.48)                   | (0.087, 0.220)                                 |            |              |                      |                      | (0.594, 0.654)                               |                            |
| <b>2. Cognitive decline</b>                                                                   |                       |                                            |                              |                                     |                                                |            |              |                      |                      |                                              |                            |
| Non-CI                                                                                        | 136/4202              | 3.2                                        | 10.1 (1.7)                   | 1 (Ref.)                            | 0.169                                          | 4521.4     | - 10.7       | 48.4                 | 75.1                 | 0.631                                        | .73                        |
| CI                                                                                            | 134/1485              | 9.4                                        | 9.6 (2.3)                    | 3.01 (2.37, 3.82)                   | (0.102, 0.248)                                 |            |              |                      |                      | (0.601, 0.660)                               |                            |
| <b>3. Age, sex threshold for poor cognitive performance AND cognitive decline</b>             |                       |                                            |                              |                                     |                                                |            |              |                      |                      |                                              |                            |
| Non-CI                                                                                        | 186/5065              | 3.6                                        | 10.1 (1.7)                   | 1 (Ref.)                            | 0.201                                          | 4505.7     | - 26.4       | 30.5                 | 90.1                 | 0.612                                        | .34                        |
| CI                                                                                            | 84/622                | 14.6                                       | 9.3 (2.6)                    | 4.14 (3.20, 5.36)                   | (0.123, 0.286)                                 |            |              |                      |                      | (0.584, 0.640)                               |                            |
| <b>4. Age, sex, education threshold for poor cognitive performance</b>                        |                       |                                            |                              |                                     |                                                |            |              |                      |                      |                                              |                            |
| Non-CI                                                                                        | 127/3920              | 3.2                                        | 10.1 (1.7)                   | 1 (Ref.)                            | 0.135                                          | 4537.2     | 5.1          | 52.0                 | 70.1                 | 0.621                                        | .72                        |
| CI                                                                                            | 143/1767              | 8.3                                        | 9.7 (2.2)                    | 2.63 (2.07, 3.34)                   | (0.076, 0.209)                                 |            |              |                      |                      | (0.591, 0.651)                               |                            |
| <b>5. Age, sex, education threshold for poor cognitive performance AND cognitive decline</b>  |                       |                                            |                              |                                     |                                                |            |              |                      |                      |                                              |                            |
| Non-CI                                                                                        | 186/5031              | 3.7                                        | 10.1 (1.7)                   | 1 (Ref.)                            | 0.185                                          | 4513.4     | - 18.7       | 30.2                 | 89.5                 | 0.609                                        | .29                        |
| CI                                                                                            | 84/656                | 13.8                                       | 9.3 (2.6)                    | 3.87 (2.99, 5.01)                   | (0.108, 0.272)                                 |            |              |                      |                      | (0.581, 0.637)                               |                            |
| <b>6. Age, sex, occupation threshold for poor cognitive performance</b>                       |                       |                                            |                              |                                     |                                                |            |              |                      |                      |                                              |                            |
| Non-CI                                                                                        | 117/3829              | 3.0                                        | 10.1 (1.7)                   | 1 (Ref.)                            | 0.157                                          | 4527.2     | - 4.9        | 56.6                 | 68.6                 | 0.629                                        | .60                        |
| CI                                                                                            | 153/1858              | 8.4                                        | 9.8 (2.1)                    | 2.83 (2.23, 3.60)                   | (0.093, 0.234)                                 |            |              |                      |                      | (0.600, 0.659)                               |                            |
| <b>7. Age, sex, occupation threshold for poor cognitive performance AND cognitive decline</b> |                       |                                            |                              |                                     |                                                |            |              |                      |                      |                                              |                            |
| Non-CI                                                                                        | 179/5004              | 3.5                                        | 10.1 (1.7)                   | 1 (Ref.)                            | 0.214                                          | 4499.1     | - 33.0       | 33.2                 | 89.2                 | 0.619                                        | .76                        |
| CI                                                                                            | 91/683                | 14.3                                       | 9.3 (2.6)                    | 4.17 (3.24, 5.37)                   | (0.131, 0.302)                                 |            |              |                      |                      | (0.591, 0.648)                               |                            |

HR: Hazard Ratio, CI: Cognitive impairment, R<sup>2</sup>=Royston's R<sup>2</sup>, AIC: Akaike information criterion, C-Statistic=Harrell's C-index, M(SD)=Mean (Standard Deviation).

<sup>a</sup>p values for difference in C-statistic.

**eTable 5. Predictive performance of seven cognitive impairment definitions for dementia using 1.96 SD threshold to define poor cognitive performance SD**

| Cognitive Impairment (CI) definitions                                                         | N cases /total | Rate of dementia/ 1000 person-years | Follow-up years M(SD) | HR (95% Confidence Interval) | R <sup>2</sup> (95% Confidence Interval) | AIC    | Δ AIC  | Sensitivity % | Specificity % | C-Statistic (95% Confidence Interval) | p-value <sup>a</sup> |
|-----------------------------------------------------------------------------------------------|----------------|-------------------------------------|-----------------------|------------------------------|------------------------------------------|--------|--------|---------------|---------------|---------------------------------------|----------------------|
| <b>1. Age and sex threshold for poor cognitive performance</b>                                |                |                                     |                       |                              |                                          |        |        |               |               |                                       |                      |
| Non-CI                                                                                        | 213/5328       | 4.0                                 | 10.0 (1.8)            | 1 (Ref.)                     | 0.159                                    | 4526.2 | Ref.   | 20.7          | 94.5          | 0.581                                 | Ref.                 |
| CI                                                                                            | 57/359         | 17.1                                | 9.3 (2.7)             | 4.41 (3.29, 5.91)            | (0.086, 0.247)                           |        |        |               |               | (0.556, 0.606)                        |                      |
| <b>2. Cognitive decline</b>                                                                   |                |                                     |                       |                              |                                          |        |        |               |               |                                       |                      |
| Non-CI                                                                                        | 136/4202       | 3.2                                 | 10.1 (1.7)            | 1 (Ref.)                     | 0.169                                    | 4521.4 | - 4.8  | 48.4          | 75.1          | 0.631                                 | .006                 |
| CI                                                                                            | 134/1485       | 9.4                                 | 9.6 (2.3)             | 3.01 (2.37, 3.82)            | (0.102, 0.248)                           |        |        |               |               | (0.601, 0.660)                        |                      |
| <b>3. Age, sex threshold for poor cognitive performance AND cognitive decline</b>             |                |                                     |                       |                              |                                          |        |        |               |               |                                       |                      |
| Non-CI                                                                                        | 230/5520       | 4.2                                 | 10.0 (1.8)            | 1 (Ref.)                     | 0.180                                    | 4515.9 | - 10.3 | 14.7          | 97.7          | 0.565                                 | .04                  |
| CI                                                                                            | 40/167         | 27.8                                | 8.6 (3.1)             | 7.09 (5.07, 9.93)            | (0.094, 0.284)                           |        |        |               |               | (0.544, 0.588)                        |                      |
| <b>4. Age, sex, education threshold for poor cognitive performance</b>                        |                |                                     |                       |                              |                                          |        |        |               |               |                                       |                      |
| Non-CI                                                                                        | 214/5304       | 4.0                                 | 10.0 (1.8)            | 1 (Ref.)                     | 0.139                                    | 4535.5 | 9.3    | 20.3          | 94.0          | 0.577                                 | .47                  |
| CI                                                                                            | 56/383         | 15.6                                | 9.4 (2.7)             | 3.98 (2.97, 5.34)            | (0.072, 0.222)                           |        |        |               |               | (0.552, 0.602)                        |                      |
| <b>5. Age, sex, education threshold for poor cognitive performance AND cognitive decline</b>  |                |                                     |                       |                              |                                          |        |        |               |               |                                       |                      |
| Non-CI                                                                                        | 232/5511       | 4.2                                 | 10.0 (1.8)            | 1 (Ref.)                     | 0.152                                    | 4529.2 | 3.0    | 13.9          | 97.5          | 0.561                                 | .02                  |
| CI                                                                                            | 38/176         | 24.5                                | 8.8 (3.0)             | 6.11 (4.34, 8.61)            | (0.082, 0.243)                           |        |        |               |               | (0.539, 0.582)                        |                      |
| <b>6. Age, sex, occupation threshold for poor cognitive performance</b>                       |                |                                     |                       |                              |                                          |        |        |               |               |                                       |                      |
| Non-CI                                                                                        | 216/5333       | 4.0                                 | 10.0 (1.8)            | 1 (Ref.)                     | 0.143                                    | 4533.4 | 7.2    | 18.9          | 94.5          | 0.576                                 | .54                  |
| CI                                                                                            | 54/354         | 16.5                                | 9.3 (2.7)             | 4.20 (3.12, 5.66)            | (0.074, 0.228)                           |        |        |               |               | (0.551, 0.600)                        |                      |
| <b>7. Age, sex, occupation threshold for poor cognitive performance AND cognitive decline</b> |                |                                     |                       |                              |                                          |        |        |               |               |                                       |                      |
| Non-CI                                                                                        | 227/5504       | 4.1                                 | 10.0 (1.8)            | 1 (Ref.)                     | 0.189                                    | 4511.3 | - 14.9 | 15.3          | 97.4          | 0.569                                 | .21                  |
| CI                                                                                            | 43/183         | 27.0                                | 8.7 (3.0)             | 6.97 (5.03, 9.66)            | (0.106, 0.284)                           |        |        |               |               | (0.547, 0.591)                        |                      |

HR: Hazard Ratio, CI: Cognitive impairment, R<sup>2</sup>=Royston's R<sup>2</sup>, AIC: Akaike information criterion, C-Statistic=Harrell's C-index, M(SD)=Mean (Standard Deviation).

<sup>a</sup>p values for difference in C-statistic.



**eTable 6. Predictive performance of seven cognitive impairment definitions for dementia in participants 65 years and older at assessment of CI**

| <b>Cognitive Impairment (CI) definitions</b>                                                  | <b>N cases /total</b> | <b>Rate of dementia/ 1000 person-years</b> | <b>Follow-up years M(SD)</b> | <b>HR (95% Confidence Interval)</b> | <b>R<sup>2</sup> (95% Confidence Interval)</b> | <b>AIC</b> | <b>Δ AIC</b> | <b>Sensitivity %</b> | <b>Specificity %</b> | <b>C-Statistic (95% Confidence Interval)</b> | <b>p-value<sup>a</sup></b> |
|-----------------------------------------------------------------------------------------------|-----------------------|--------------------------------------------|------------------------------|-------------------------------------|------------------------------------------------|------------|--------------|----------------------|----------------------|----------------------------------------------|----------------------------|
| <b>1. Age and sex threshold for poor cognitive performance</b>                                |                       |                                            |                              |                                     |                                                |            |              |                      |                      |                                              |                            |
| Non-CI                                                                                        | 157/2424              | 6.6                                        | 9.8 (2.1)                    | 1 (Ref.)                            | 0.145                                          | 3551.0     | Ref.         | 31.7                 | 87.2                 | 0.605                                        | Ref.                       |
| CI                                                                                            | 75/413                | 20.3                                       | 9.0 (2.8)                    | 3.18 (2.42, 4.19)                   | (0.074, 0.234)                                 |            |              |                      |                      | (0.574, 0.635)                               |                            |
| <b>2. Cognitive decline</b>                                                                   |                       |                                            |                              |                                     |                                                |            |              |                      |                      |                                              |                            |
| Non-CI                                                                                        | 112/1978              | 5.7                                        | 9.9 (2.0)                    | 1 (Ref.)                            | 0.146                                          | 3550.8     | - 0.2        | 50.5                 | 71.8                 | 0.626                                        | .28                        |
| CI                                                                                            | 120/859               | 15.2                                       | 9.2 (2.6)                    | 2.75 (2.12, 3.56)                   | (0.076, 0.231)                                 |            |              |                      |                      | (0.594, 0.658)                               |                            |
| <b>3. Age, sex threshold for poor cognitive performance AND cognitive decline</b>             |                       |                                            |                              |                                     |                                                |            |              |                      |                      |                                              |                            |
| Non-CI                                                                                        | 180/2637              | 7.0                                        | 9.8 (2.1)                    | 1 (Ref.)                            | 0.179                                          | 3537.3     | - 13.7       | 21.8                 | 94.4                 | 0.591                                        | .15                        |
| CI                                                                                            | 52/200                | 30.9                                       | 8.4 (3.1)                    | 4.71 (3.46, 6.41)                   | (0.092, 0.276)                                 |            |              |                      |                      | (0.563, 0.618)                               |                            |
| <b>4. Age, sex, education threshold for poor cognitive performance</b>                        |                       |                                            |                              |                                     |                                                |            |              |                      |                      |                                              |                            |
| Non-CI                                                                                        | 152/2404              | 6.5                                        | 9.8 (2.1)                    | 1 (Ref.)                            | 0.159                                          | 3545.5     | - 5.5        | 33.6                 | 86.6                 | 0.609                                        | .64                        |
| CI                                                                                            | 80/433                | 20.5                                       | 9.0 (2.9)                    | 3.28 (2.50, 4.30)                   | (0.088, 0.251)                                 |            |              |                      |                      | (0.578, 0.640)                               |                            |
| <b>5. Age, sex, education threshold for poor cognitive performance AND cognitive decline</b>  |                       |                                            |                              |                                     |                                                |            |              |                      |                      |                                              |                            |
| Non-CI                                                                                        | 177/2630              | 6.9                                        | 9.8 (2.1)                    | 1 (Ref.)                            | 0.192                                          | 3531.5     | - 19.5       | 22.5                 | 94.2                 | 0.595                                        | .40                        |
| CI                                                                                            | 55/207                | 31.5                                       | 8.4 (3.1)                    | 4.84 (3.58, 6.55)                   | (0.106, 0.294)                                 |            |              |                      |                      | (0.566, 0.623)                               |                            |
| <b>6. Age, sex, occupation threshold for poor cognitive performance</b>                       |                       |                                            |                              |                                     |                                                |            |              |                      |                      |                                              |                            |
| Non-CI                                                                                        | 155/2420              | 6.5                                        | 9.8 (2.1)                    | 1 (Ref.)                            | 0.151                                          | 3548.7     | - 2.3        | 31.6                 | 87.0                 | 0.607                                        | .85                        |
| CI                                                                                            | 77/417                | 20.5                                       | 9.0 (2.8)                    | 3.22 (2.45, 4.24)                   | (0.079, 0.239)                                 |            |              |                      |                      | (0.576, 0.638)                               |                            |
| <b>7. Age, sex, occupation threshold for poor cognitive performance AND cognitive decline</b> |                       |                                            |                              |                                     |                                                |            |              |                      |                      |                                              |                            |
| Non-CI                                                                                        | 177/2625              | 6.9                                        | 9.8 (2.1)                    | 1 (Ref.)                            | 0.186                                          | 3534.1     | - 16.9       | 22.5                 | 94.0                 | 0.594                                        | .39                        |
| CI                                                                                            | 55/212                | 30.7                                       | 8.5 (3.1)                    | 4.69 (3.47, 6.35)                   | (0.104, 0.287)                                 |            |              |                      |                      | (0.566, 0.622)                               |                            |

HR: Hazard Ratio, CI: Cognitive impairment, R<sup>2</sup>=Royston's R<sup>2</sup>, AIC: Akaike information criterion, C-Statistic=Harrell's C-index, M(SD)=Mean (Standard Deviation).

<sup>a</sup>p values for difference in C-statistic.

**eTable 7. Role of participants who revert their cognitive status to normal between 1997-2009 in classification of cognitive impairment: association with risk of dementia**

| Cognitive Impairment (CI) <sup>a</sup>                                   | N cases/total | Rate of dementia per 1000 person years | Follow-up years M(SD) | HR (95% Confidence Interval) |
|--------------------------------------------------------------------------|---------------|----------------------------------------|-----------------------|------------------------------|
| <b>Age and sex threshold for poor cognitive performance</b>              |               |                                        |                       |                              |
| Non-CI                                                                   | 161/4399      | 3.6                                    | 10.1 (1.7)            | 1 (Ref.)                     |
| Non-CI (previous poor cognition)                                         | 18/467        | 3.8                                    | 10.0 (1.8)            | 1.06 (0.65, 1.73)            |
| CI                                                                       | 91/821        | 11.6                                   | 9.5 (2.4)             | 3.27 (2.53, 4.24)            |
| <b>Age, sex, and education threshold for poor cognitive performance</b>  |               |                                        |                       |                              |
| Non-CI                                                                   | 157/4345      | 3.6                                    | 10.1 (1.7)            | 1 (Ref.)                     |
| Non-CI (previous poor cognition)                                         | 18/505        | 3.6                                    | 10.0 (1.8)            | 1.00 (0.62, 1.63)            |
| CI                                                                       | 95/837        | 11.9                                   | 9.5 (2.5)             | 3.40 (2.63, 4.38)            |
| <b>Age, sex, and occupation threshold for poor cognitive performance</b> |               |                                        |                       |                              |
| Non-CI                                                                   | 157/4066      | 3.7                                    | 10.1 (1.7)            | 1 (Ref.)                     |
| Non-CI (previous poor cognition)                                         | 21/638        | 3.3                                    | 10.0 (1.8)            | 0.89 (0.57, 1.41)            |
| CI                                                                       | 92/826        | 11.6                                   | 9.6 (2.4)             | 3.20 (2.47, 4.14)            |

HR: Hazard Ratio, M(SD)=Mean (Standard Deviation).

<sup>a</sup>Cognitive impairment categories are mutually exclusive.

**eTable 8. Predictive performance of different predictive models including cognitive impairment definitions and demographic variables (age, sex, and education) for dementia**

|                                                                                                                                                       | N cases<br>/total | Rate of<br>dementia/<br>1000<br>person-<br>years | Follow-up<br>years<br>M(SD) | HR (95%<br>Confidence<br>Interval) | R <sup>2</sup> (95%<br>Confidence<br>Interval) | AIC    | Δ AIC | Sensitivity<br>% | Specificity<br>% | C-Statistic<br>(95%<br>Confidence<br>Interval) | p-<br>value <sup>a</sup> | p-<br>value <sup>b</sup> |
|-------------------------------------------------------------------------------------------------------------------------------------------------------|-------------------|--------------------------------------------------|-----------------------------|------------------------------------|------------------------------------------------|--------|-------|------------------|------------------|------------------------------------------------|--------------------------|--------------------------|
| <b><u>PREDICTIVE MODELS</u></b>                                                                                                                       |                   |                                                  |                             |                                    |                                                |        |       |                  |                  |                                                |                          |                          |
| <b>Model 1: Age and sex threshold for poor cognitive performance + demographic variables (age, sex, and education)</b>                                |                   |                                                  |                             |                                    |                                                |        |       |                  |                  |                                                |                          |                          |
| Non-CI                                                                                                                                                | 179/4866          | 3.7                                              | 10.1 (1.7)                  | 1 (Ref.)                           | 0.643                                          | 4235.0 | Ref.  | 77.2             | 69.8             | 0.807                                          | Ref.                     | <.0001                   |
| CI                                                                                                                                                    | 91/821            | 11.6                                             | 9.5 (2.4)                   | 3.57 (2.76, 4.61)                  | (0.565, 0.728)                                 |        |       |                  |                  | (0.783, 0.831)                                 |                          |                          |
| <b>Model 2: Cognitive decline + demographic variables (age, sex, and education)</b>                                                                   |                   |                                                  |                             |                                    |                                                |        |       |                  |                  |                                                |                          |                          |
| Non-CI                                                                                                                                                | 136/4202          | 3.2                                              | 10.1 (1.7)                  | 1 (Ref.)                           | 0.606                                          | 4266.5 | 31.5  | 79.5             | 68.2             | 0.802                                          | .47                      | <.0001                   |
| CI                                                                                                                                                    | 134/1485          | 9.4                                              | 9.6 (2.3)                   | 2.38 (1.87, 3.03)                  | (0.526, 0.688)                                 |        |       |                  |                  | (0.777, 0.827)                                 |                          |                          |
| <b>Model 3: Age, sex threshold for poor cognitive performance AND cognitive decline + demographic variables (age, sex, and education)</b>             |                   |                                                  |                             |                                    |                                                |        |       |                  |                  |                                                |                          |                          |
| Non-CI                                                                                                                                                | 210/5349          | 3.9                                              | 10.1 (1.8)                  | 1 (Ref.)                           | 0.644                                          | 4234.4 | - 0.6 | 76.1             | 71.7             | 0.803                                          | .40                      | .001                     |
| CI                                                                                                                                                    | 60/338            | 19.8                                             | 9.0 (2.9)                   | 4.67 (3.49, 6.24)                  | (0.567, 0.727)                                 |        |       |                  |                  | (0.778, 0.828)                                 |                          |                          |
| <b>Model 4: Age, sex, education threshold for poor cognitive performance + demographic variables (age, sex, and education)</b>                        |                   |                                                  |                             |                                    |                                                |        |       |                  |                  |                                                |                          |                          |
| Non-CI                                                                                                                                                | 175/4850          | 3.6                                              | 10.1 (1.7)                  | 1 (Ref.)                           | 0.647                                          | 4231.9 | - 3.1 | 79.8             | 68.2             | 0.807                                          | .89                      | <.0001                   |
| CI                                                                                                                                                    | 95/837            | 11.9                                             | 9.5 (2.5)                   | 3.56 (2.77, 4.58)                  | (0.565, 0.728)                                 |        |       |                  |                  | (0.782, 0.831)                                 |                          |                          |
| <b>Model 5: Age, sex, education threshold for poor cognitive performance AND cognitive decline + demographic variables (age, sex, and education)</b>  |                   |                                                  |                             |                                    |                                                |        |       |                  |                  |                                                |                          |                          |
| Non-CI                                                                                                                                                | 207/5340          | 3.9                                              | 10.1 (1.8)                  | 1 (Ref.)                           | 0.651                                          | 4228.1 | - 6.9 | 78.4             | 69.4             | 0.804                                          | .52                      | <.0001                   |
| CI                                                                                                                                                    | 63/347            | 20.2                                             | 9.0 (2.9)                   | 4.79 (3.61, 6.37)                  | (0.573, 0.732)                                 |        |       |                  |                  | (0.779, 0.829)                                 |                          |                          |
| <b>Model 6: Age, sex, occupation threshold for poor cognitive performance + demographic variables (age, sex, and education)</b>                       |                   |                                                  |                             |                                    |                                                |        |       |                  |                  |                                                |                          |                          |
| Non-CI                                                                                                                                                | 178/4861          | 3.6                                              | 10.1 (1.8)                  | 1 (Ref.)                           | 0.640                                          | 4237.8 | 2.8   | 79.4             | 68.5             | 0.807                                          | .93                      | <.0001                   |
| CI                                                                                                                                                    | 92/826            | 11.6                                             | 9.6 (2.4)                   | 3.42 (2.65, 4.40)                  | (0.562, 0.720)                                 |        |       |                  |                  | (0.782, 0.831)                                 |                          |                          |
| <b>Model 7: Age, sex, occupation threshold for poor cognitive performance AND cognitive decline + demographic variables (age, sex, and education)</b> |                   |                                                  |                             |                                    |                                                |        |       |                  |                  |                                                |                          |                          |
| Non-CI                                                                                                                                                | 209/5333          | 3.9                                              | 10.1 (1.8)                  | 1 (Ref.)                           | 0.641                                          | 4236.9 | 1.9   | 76.6             | 71.1             | 0.801                                          | .28                      | <.0001                   |
| CI                                                                                                                                                    | 61/354            | 19.0                                             | 9.0 (2.9)                   | 4.45 (3.34, 5.93)                  | (0.563, 0.727)                                 |        |       |                  |                  | (0.775, 0.827)                                 |                          |                          |
| <b><u>DEMOGRAPHIC MODEL</u></b>                                                                                                                       |                   |                                                  |                             |                                    |                                                |        |       |                  |                  |                                                |                          |                          |
| <b>Age, sex, &amp;<br/>education</b>                                                                                                                  | 270/5687          | NA                                               | NA                          | NA                                 | 0.543<br>(0.465, 0.626)                        | 4312.6 | 77.6  | 74.2             | 72.2             | 0.783<br>(0.758, 0.809)                        | <.0001                   | Ref.                     |

HR: Hazard Ratio, CI: Cognitive impairment, R<sup>2</sup>=Royston's R<sup>2</sup>, AIC: Akaike information criterion, C-Statistic=Harrell's C-index, M(SD)=Mean (Standard Deviation).

<sup>a</sup>p values for difference in C-statistic using definition 1 as reference.

<sup>b</sup>p values for difference in C-statistic using demographic model as reference.
